# Supplementary material for: LACTB induces cancer cell death through the activation of the intrinsic caspase-independent pathway in breast cancer
Source: PubMed Central journal article supplement (PMC9950249; doi:10.1007/s10495-022-01775-4), 2022-10-25

**Figure 4B**

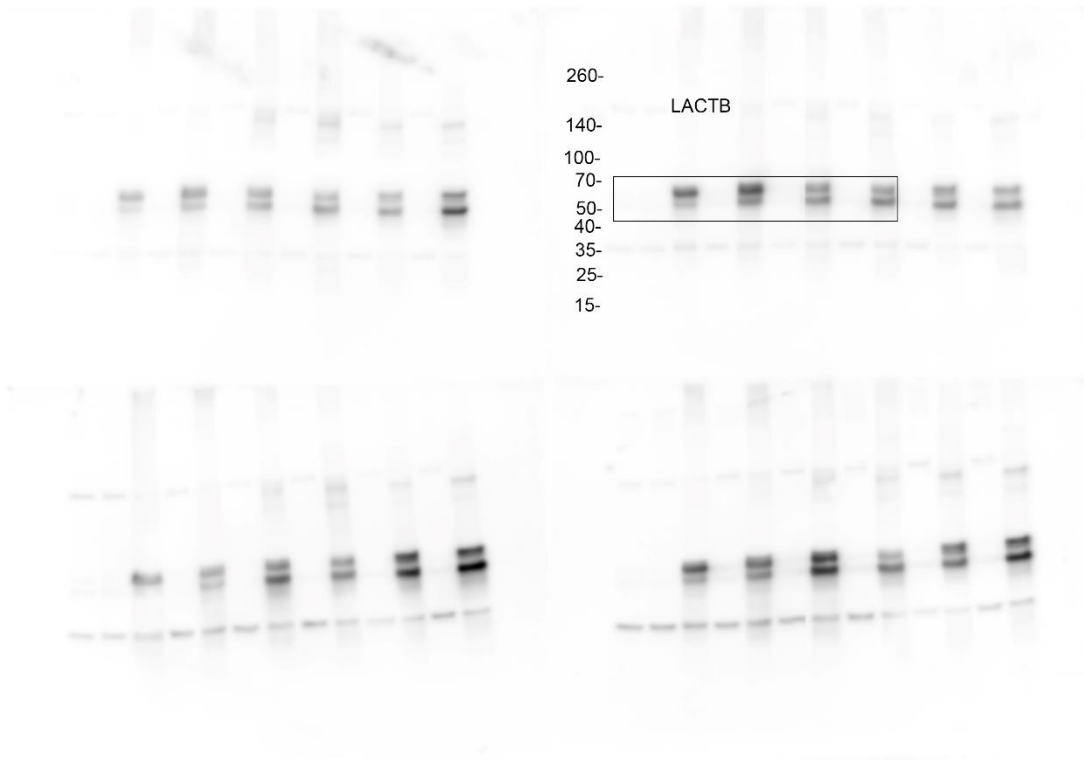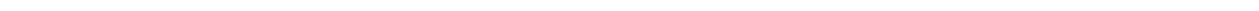

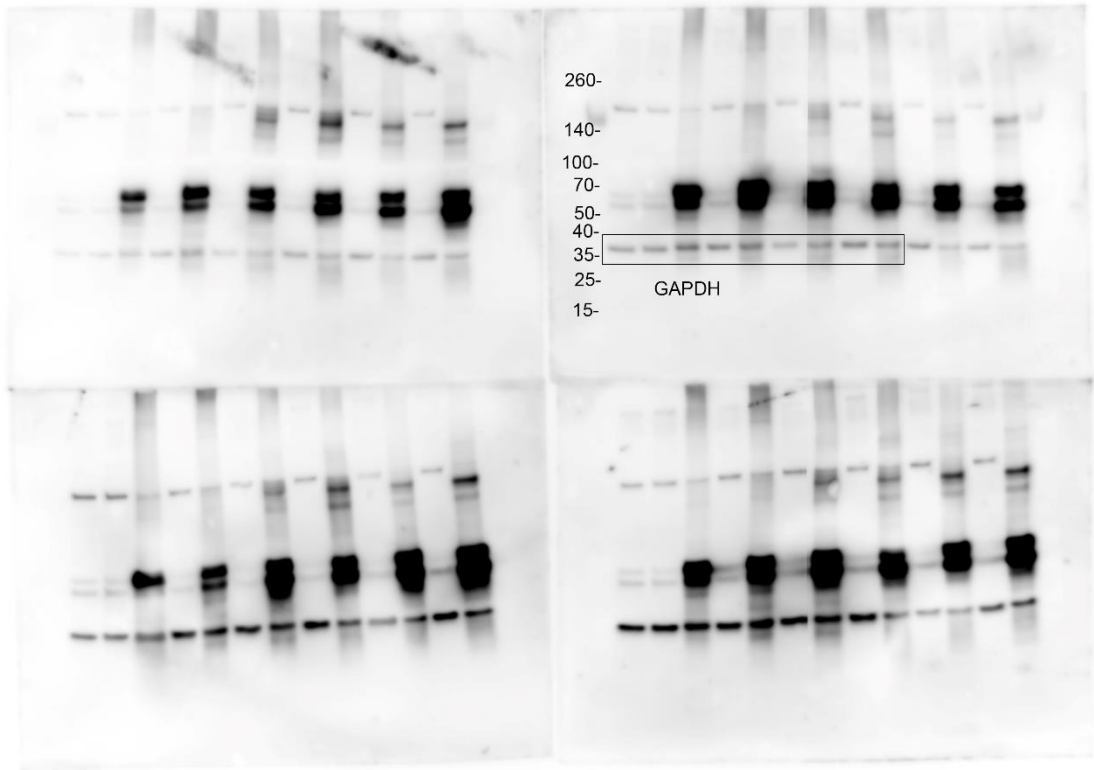

---

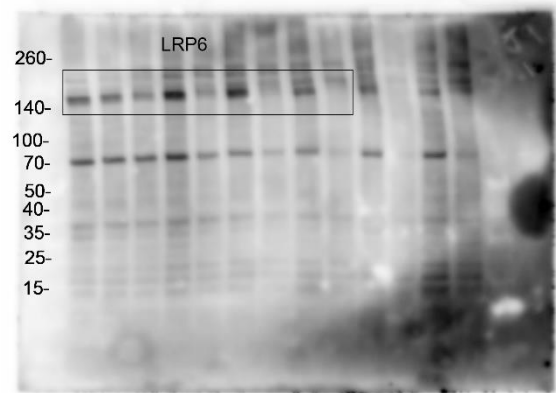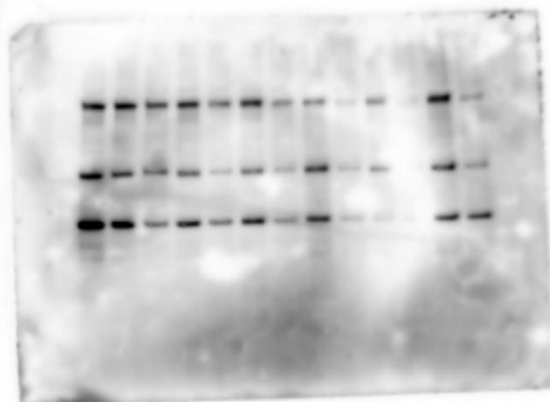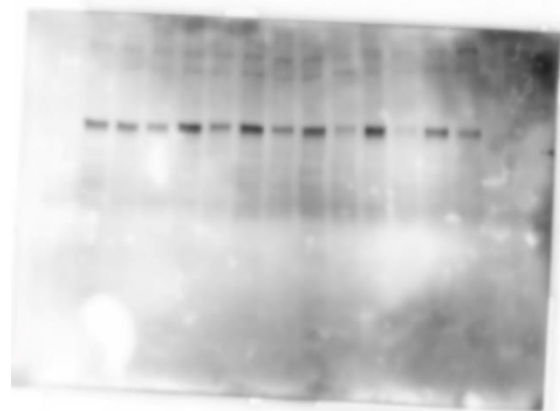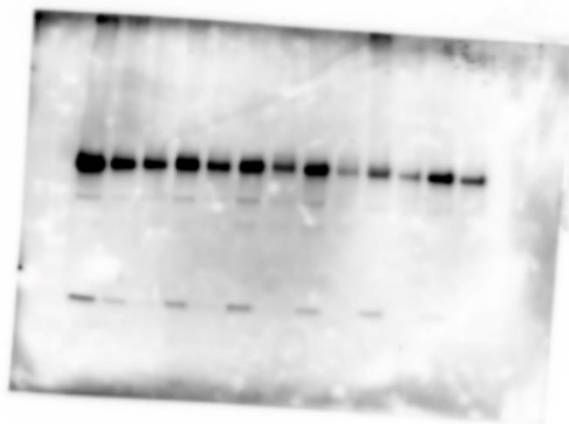

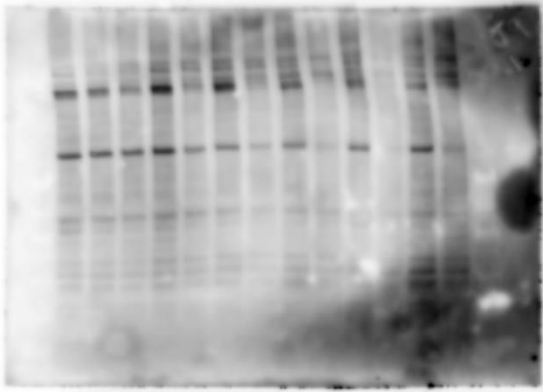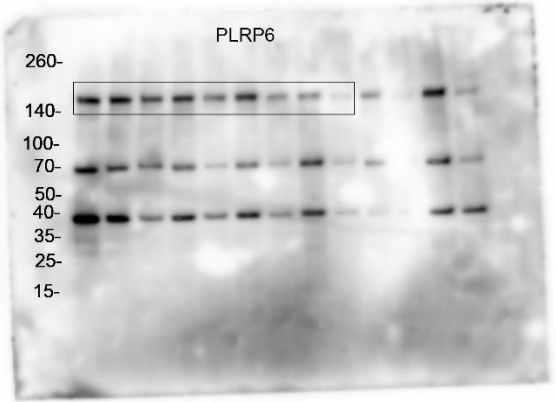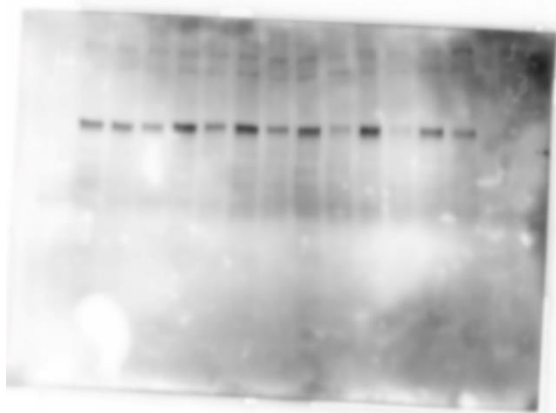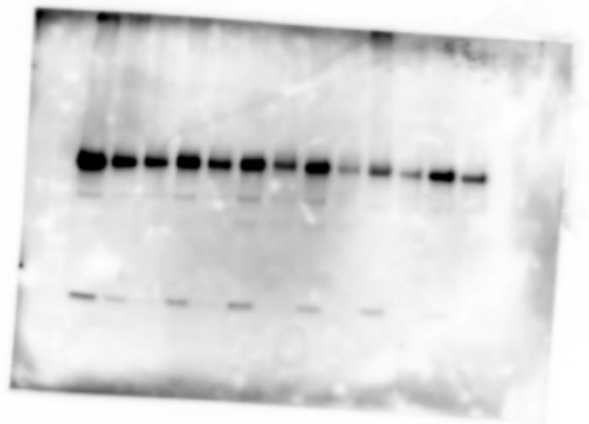

---

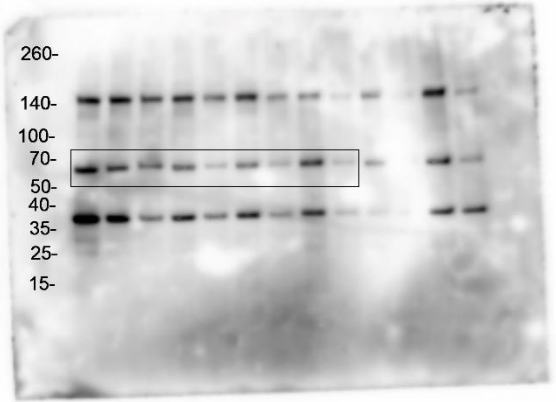

---

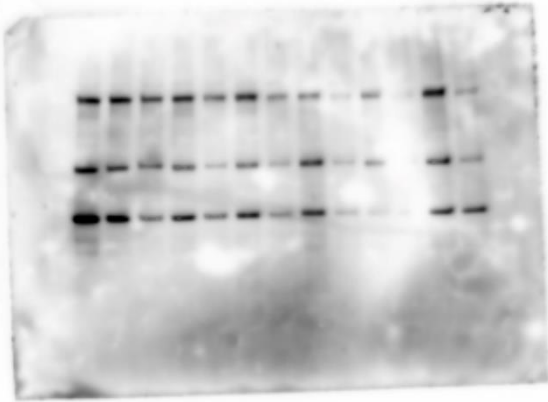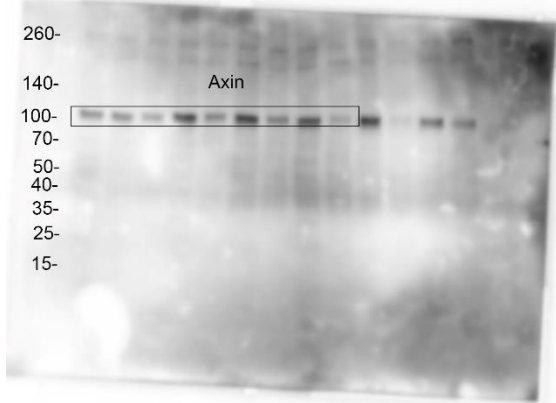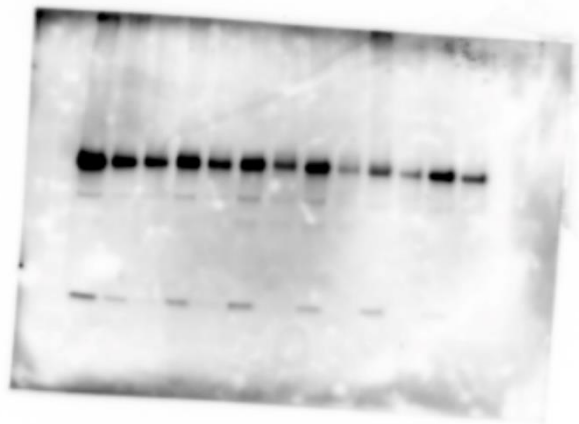

Supplement: 10495_2022_1775_MOESM4_ESM.pdf [file 10495_2022_1775_MOESM4_ESM.pdf]
