# Supplementary material for: LACTB induces cancer cell death through the activation of the intrinsic caspase-independent pathway in breast cancer
Source: PubMed Central journal article supplement (PMC9950249; doi:10.1007/s10495-022-01775-4), 2022-10-25
Supplement: 10495_2022_1775_MOESM5_ESM.pdf [file 10495_2022_1775_MOESM5_ESM.pdf]

**Figure 4C**

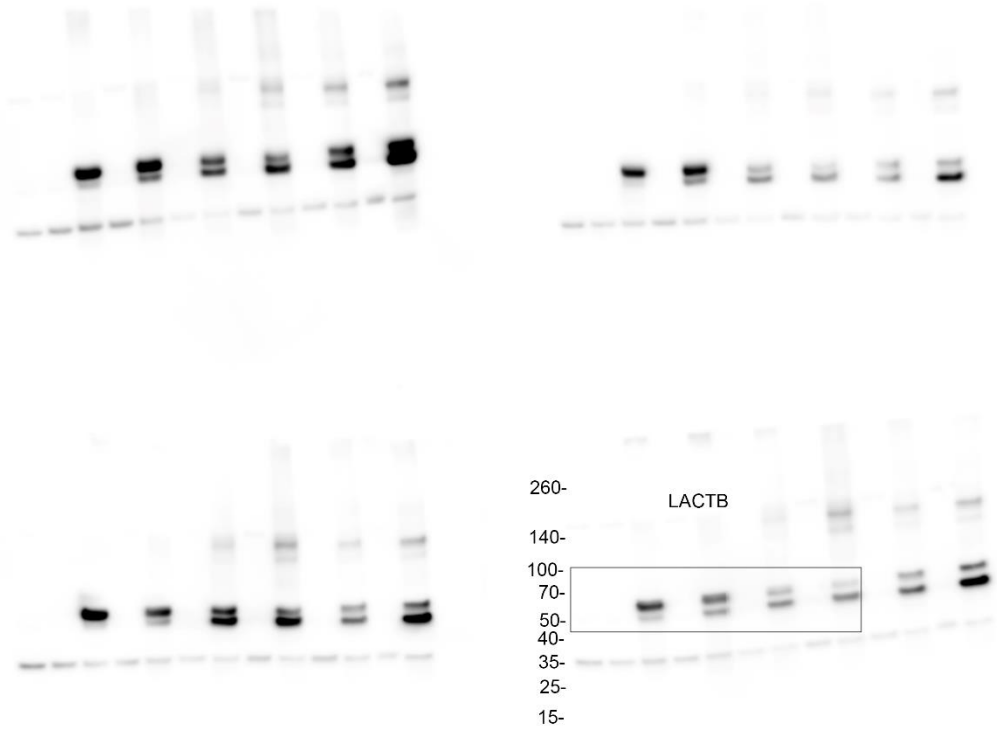

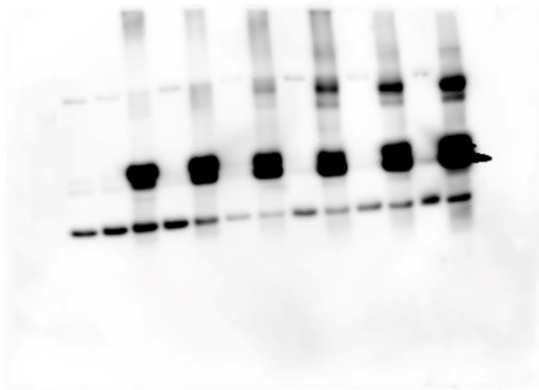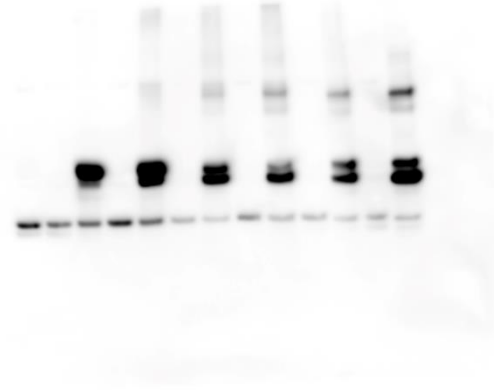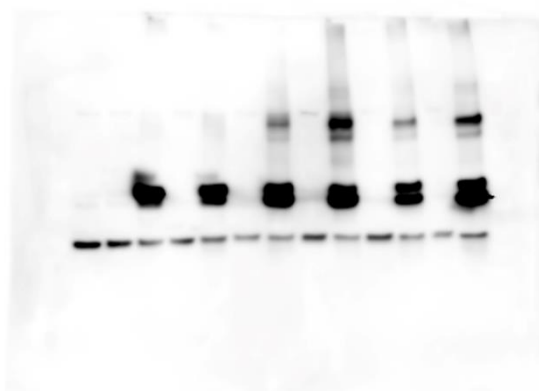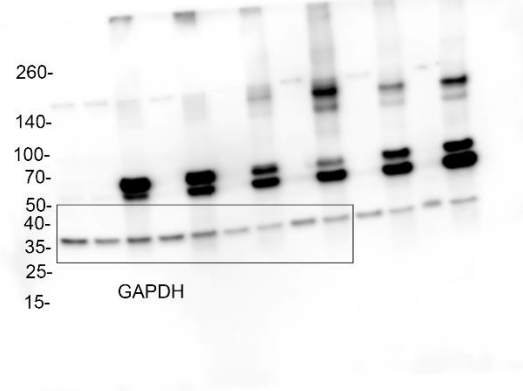

---

260-

140-

100-

70-

50-

40-

35-

25-

15-

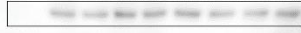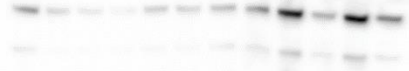

260-  
140-  
100-  
70-  
50-  
40-  
35-  
25-  
15-

NFkB

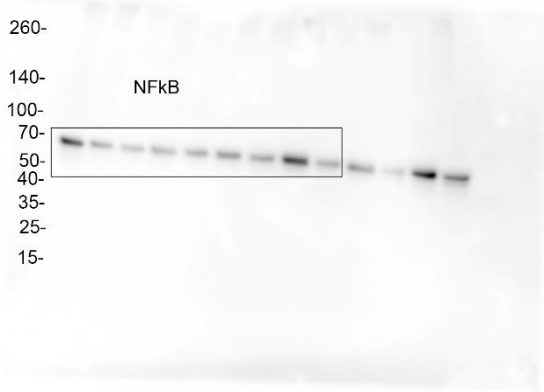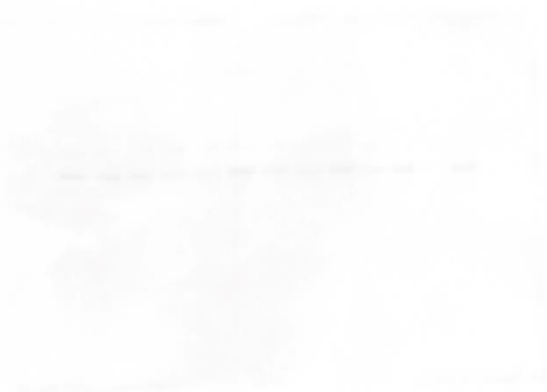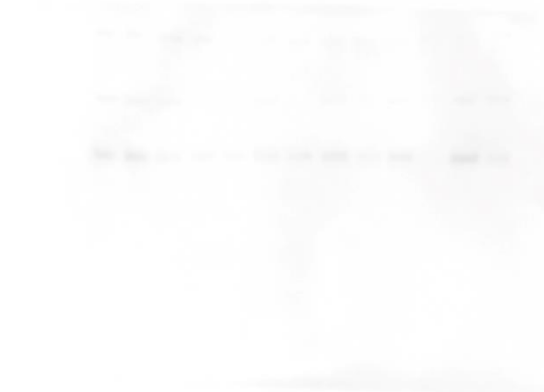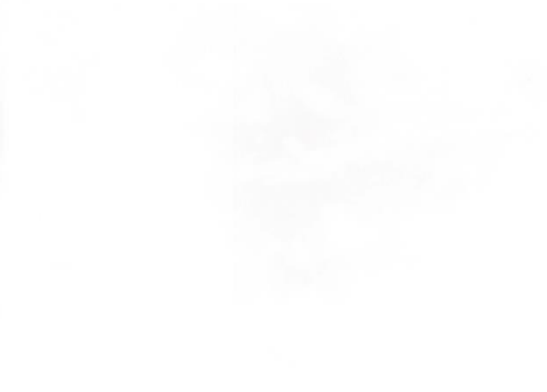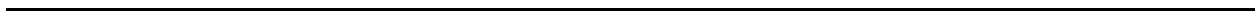

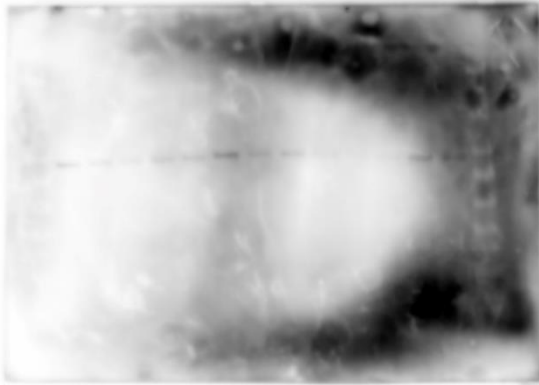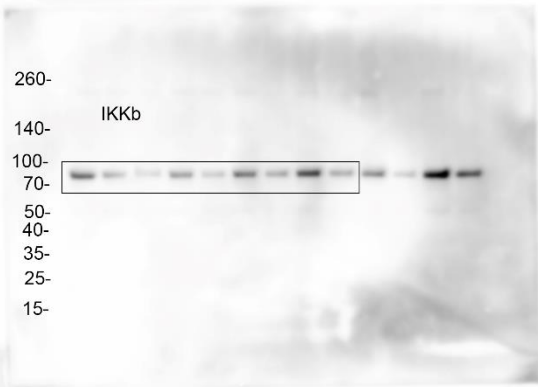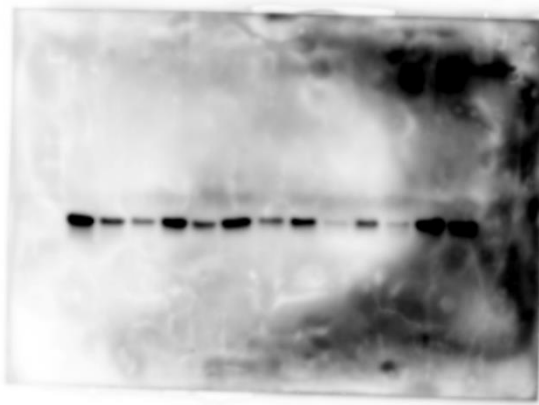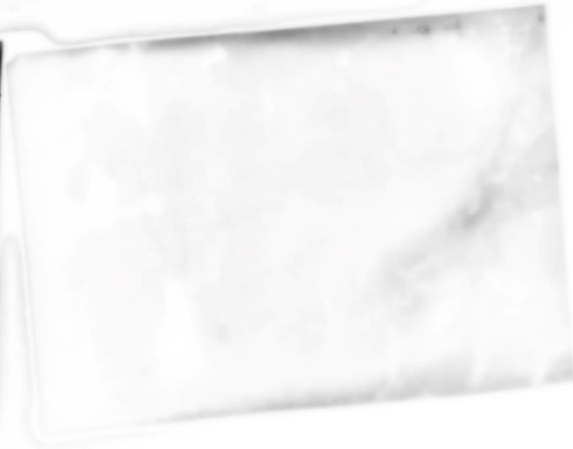

---

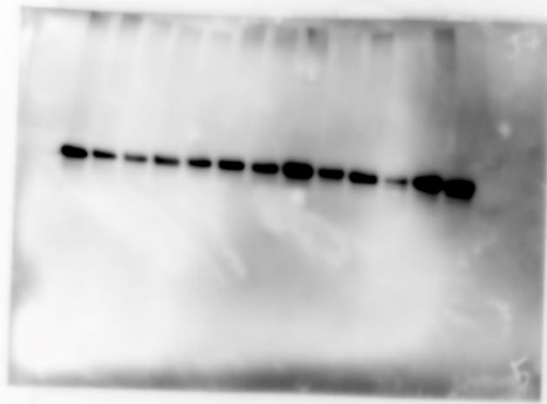

260-  
140-  
100-  
70-  
50-  
40-  
35-  
25-  
15-

pNFkB

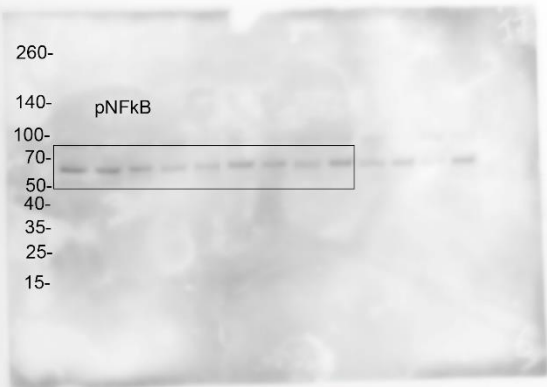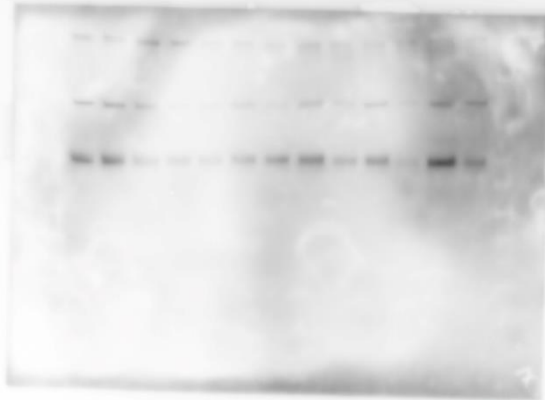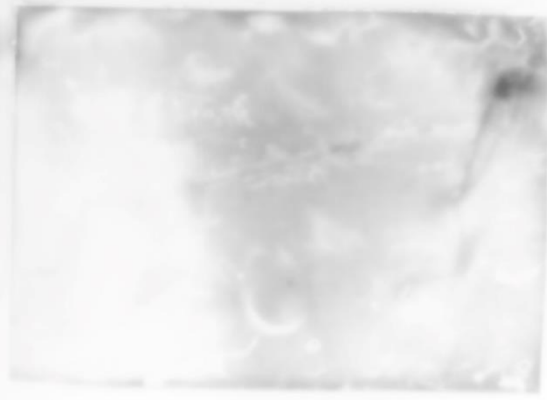

---

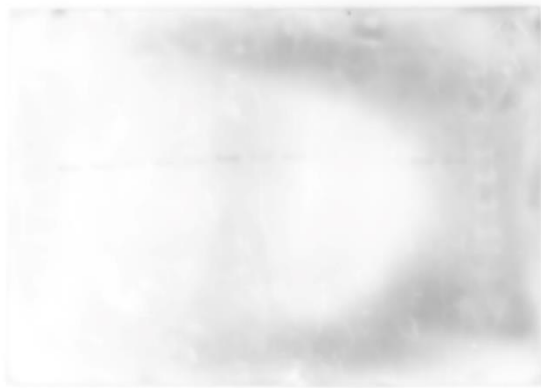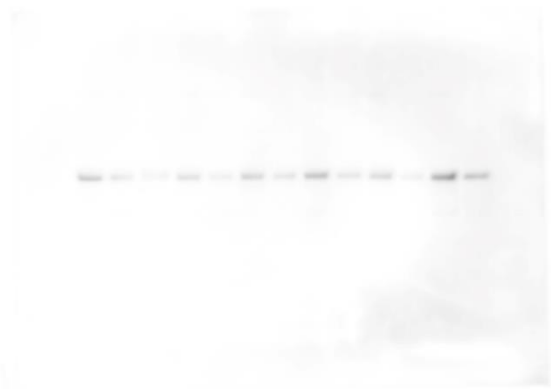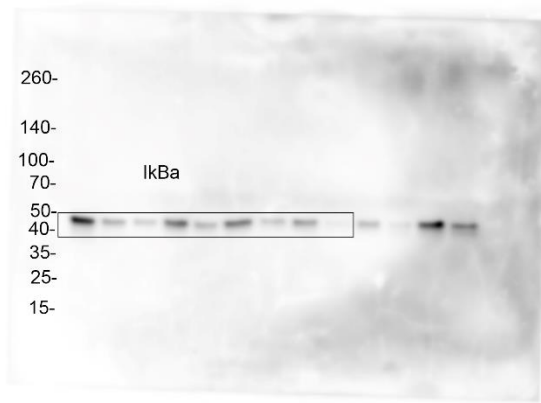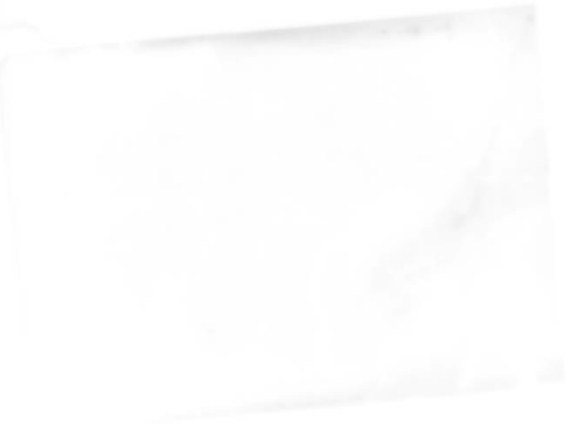

---
