# Supplementary material for: LACTB induces cancer cell death through the activation of the intrinsic caspase-independent pathway in breast cancer
Source: PubMed Central journal article supplement (PMC9950249; doi:10.1007/s10495-022-01775-4), 2022-10-25
Supplement: 10495_2022_1775_MOESM8_ESM.pdf [file 10495_2022_1775_MOESM8_ESM.pdf]

## Supplementary Figure 3 HCC1806

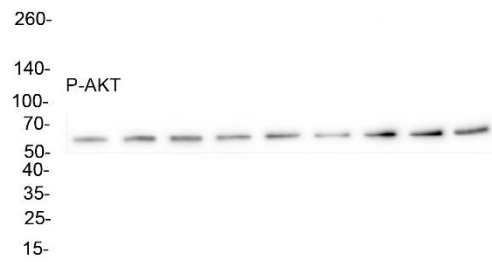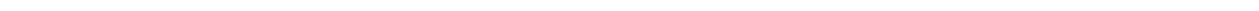

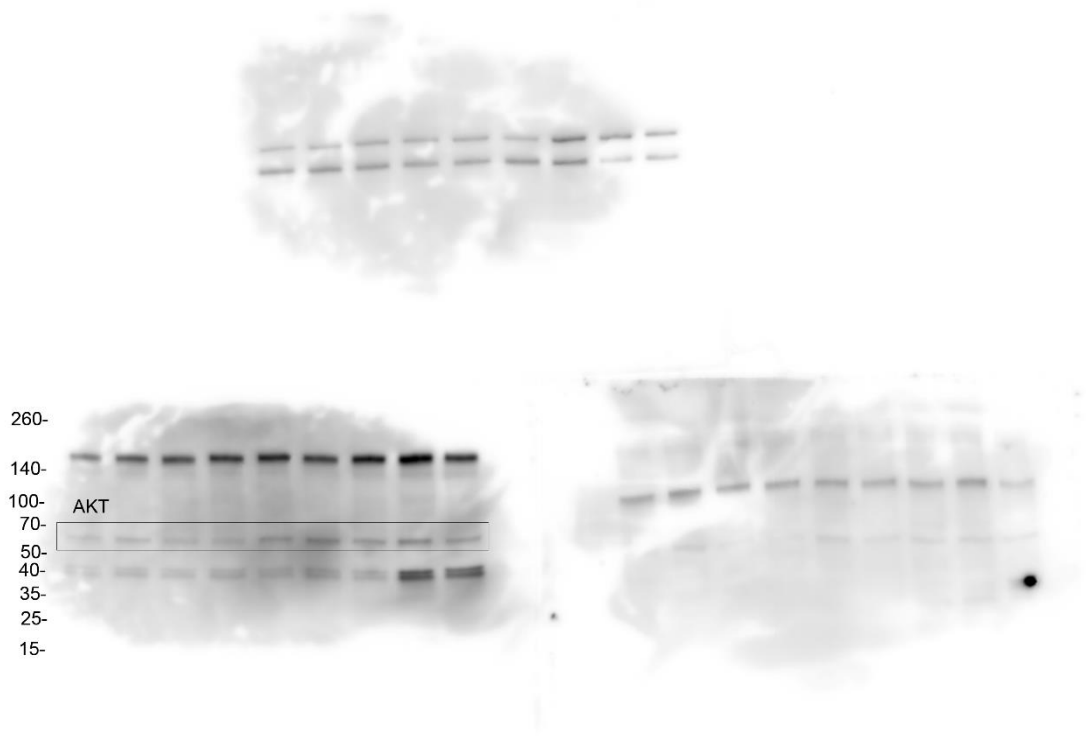

---

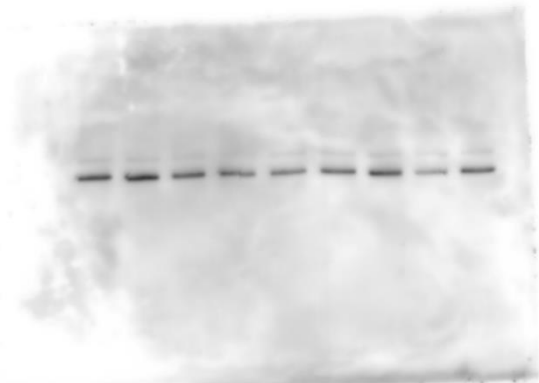

260-  
EGFR  
140-  
100-  
70-  
50-  
40-  
35-  
25-  
15-

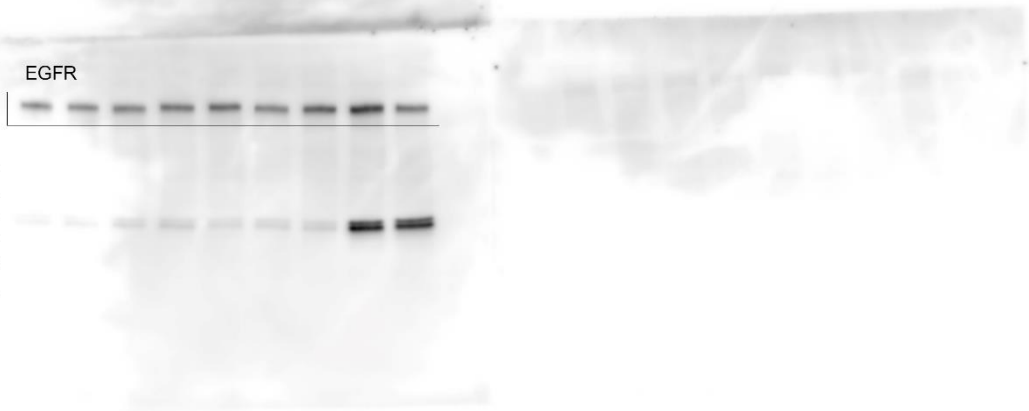

---

260-  
140-  
100-  
70-  
50-  
40-  
35-  
25-  
15-

GAPDH

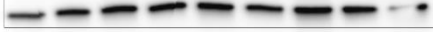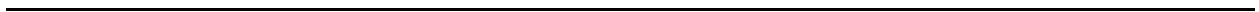

260-  
140-  
100-  
70-  
50-  
40-  
35-  
25-  
15-

LACTB

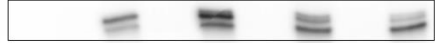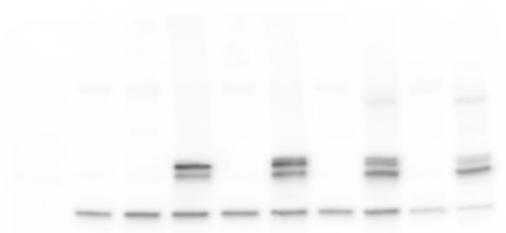

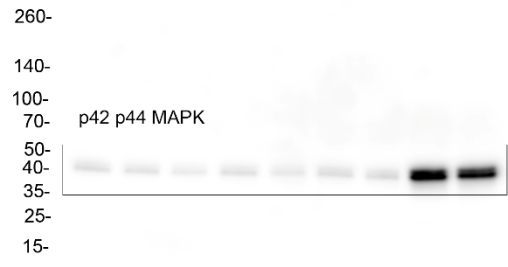

---

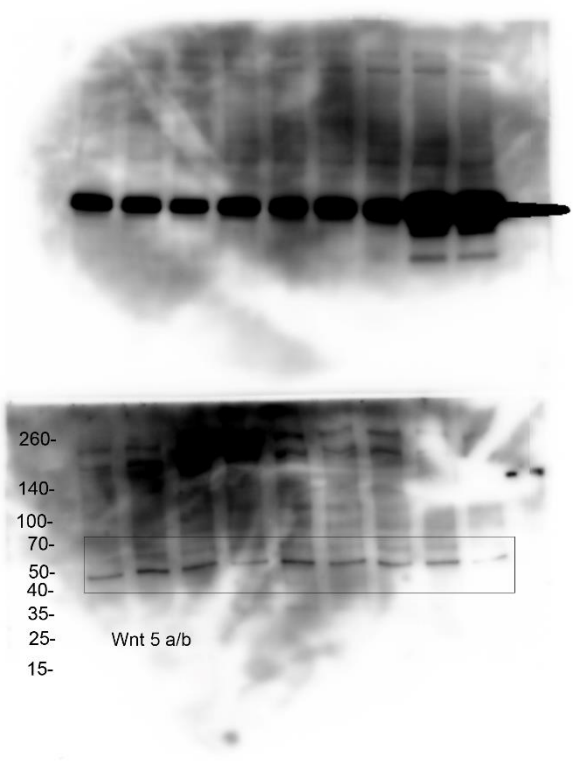

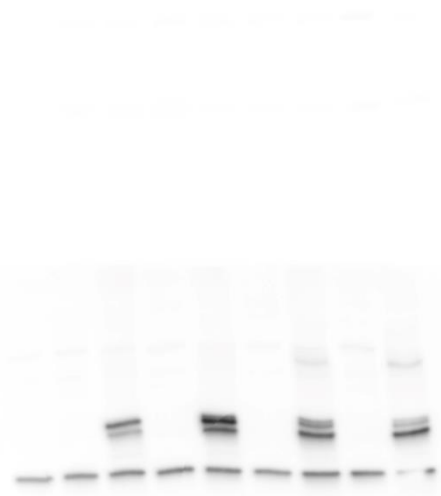

260-  
140-  
100-  
70-  
50-  
40-  
35-  
25-  
15-

GAPDH

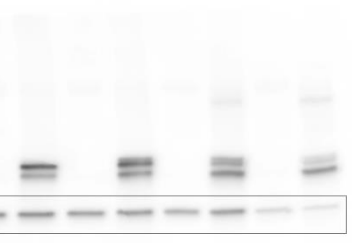





260-  
140-  
100-  
70-  
50-  
40-  
35-  
25-  
15-

LACTB

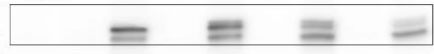

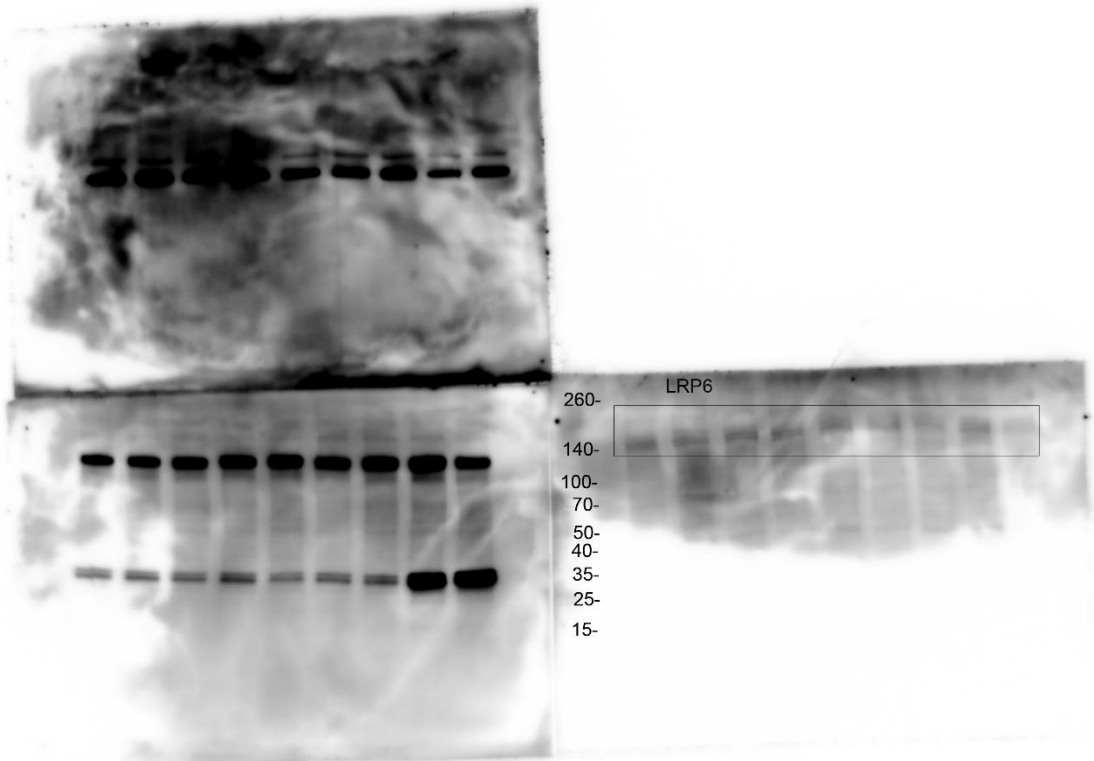

---

260-

140-

100- NFkB

70-

50-

40-

35-

25-

15-

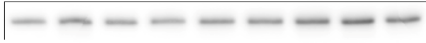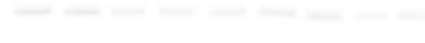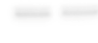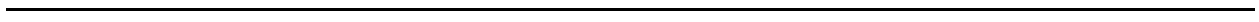

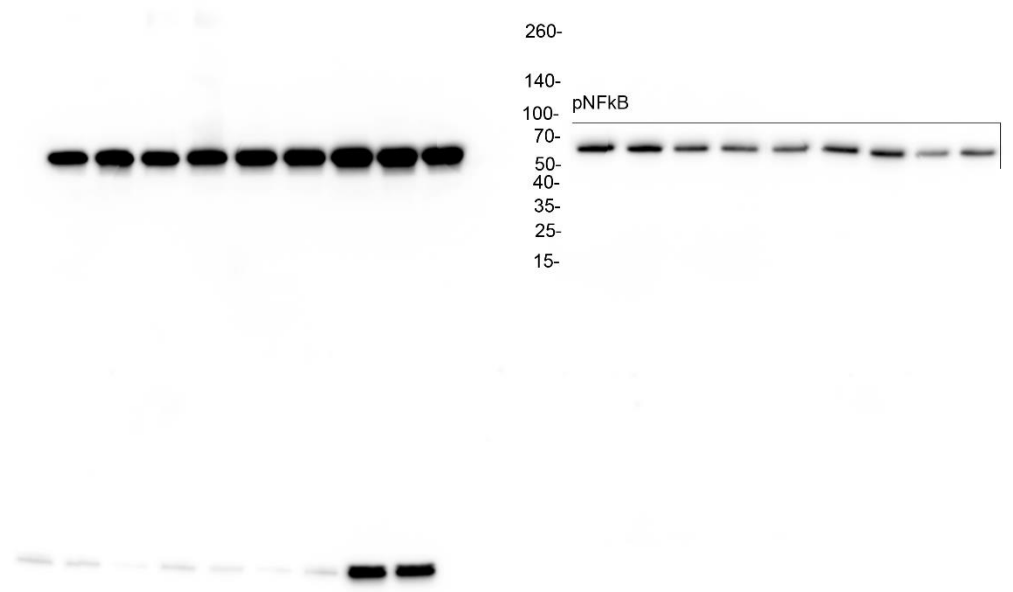

---

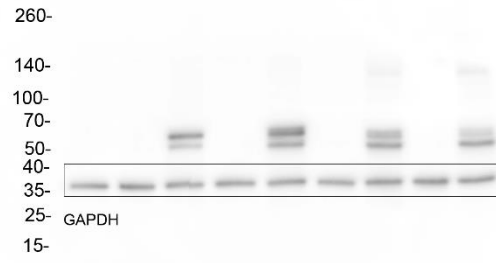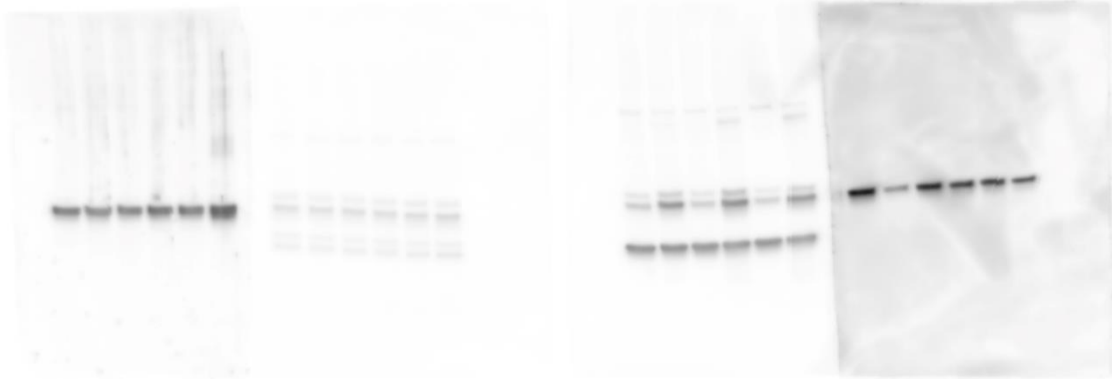

---

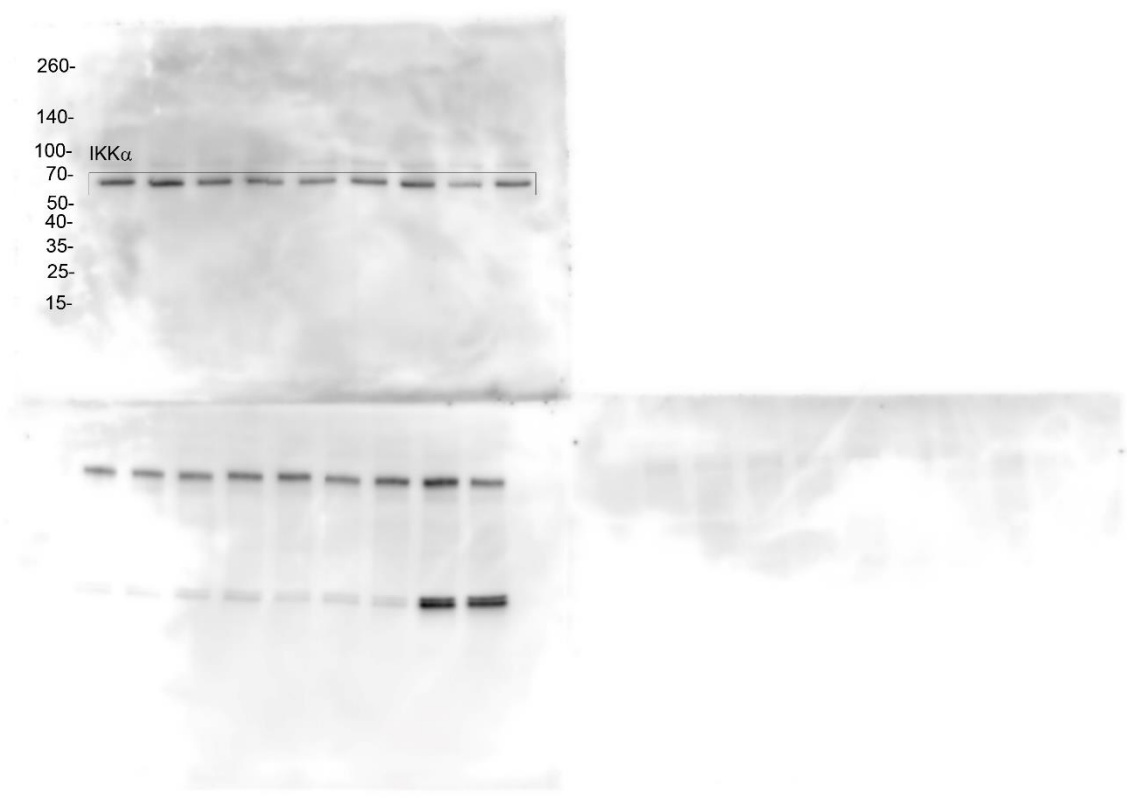

---

260-  
140-  
100-  
70-  
50-  
40-  
35-  
25-  
15-

IKK $\beta$

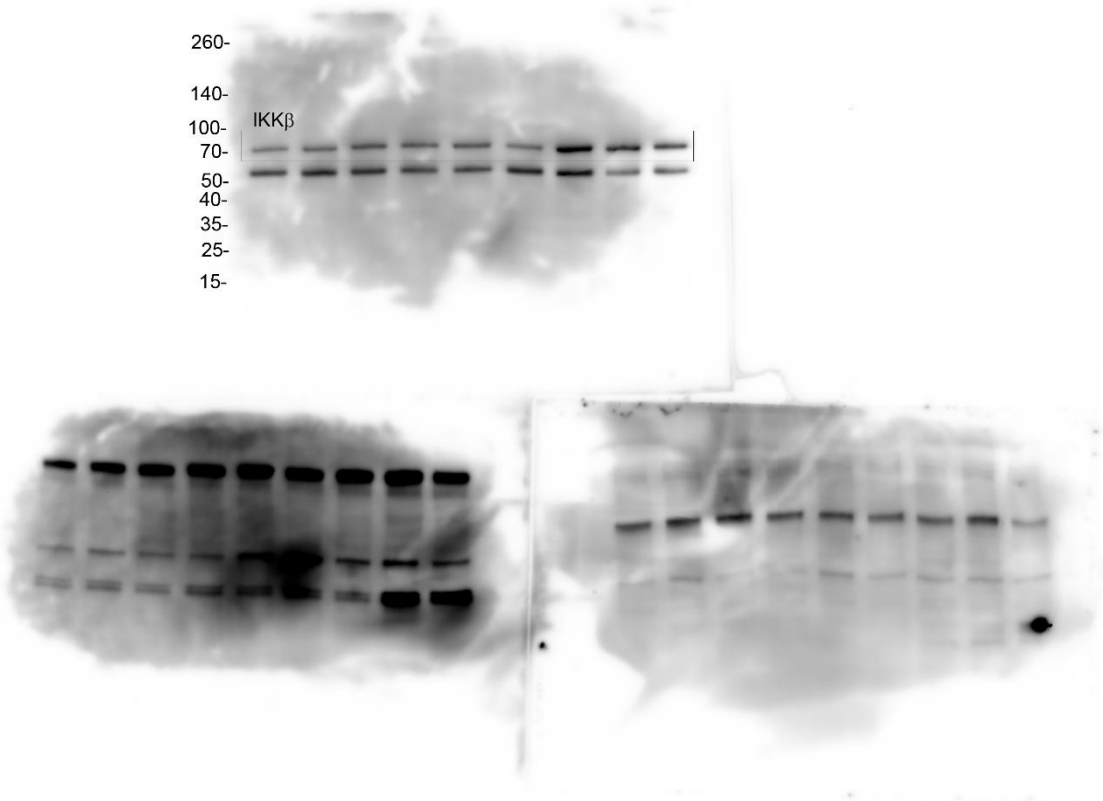

260-

140-

100- LACTB

70-

50-

40-

35-

25-

15-



---
